# Supplementary material for: Reactive extraction and in situ self-catalyzed methanolysis of germinated oilseed for biodiesel production
Source: Royal Society of Chemistry journal article supplement (doi:10.1039/c0ee00350f), 2011-01-01
Supplement: c0ee00350f.pdf [file c0ee00350f.pdf]

Electronic Supplementary Information for  
**Reactive extraction and *in situ* self-catalyzed methanolysis of  
germinated oilseed for biodiesel production**

**Hanqi Gu, Yanjun Jiang, Liya Zhou, Jing Gao\***

*School of Chemical Engineering and Technology, HeBei University of Technology, Tianjin 300130,  
China*

[\*] To whom correspondence should be addressed. E-mail: [jgao@hebut.edu.cn](mailto:jgao@hebut.edu.cn).

**Content:**

**Table S1** GC-MS analysis of composites of extracted oil from germinated seed and  
sample from reaction product

**Table S1** GC-MS analysis of composites of extracted oil from germinated seed and  
 sample from reaction product

| Rt(min) | m/z                         | Systemic name                                     | Compound           |
|---------|-----------------------------|---------------------------------------------------|--------------------|
| 12.38   | 270,227,143,87,74,55        | Hexadecanoic acid, methyl ester                   | Methyl<br>palmitic |
| 12.77   | 256,213,129,83,73,43        | n-Hexadecanoic acid                               | Palmitic acid      |
| 13.68   | 294,262,150,109,95,81,67    | 9,12-Octadecadienoic acid, methyl<br>ester,(E,E)- | Methyl<br>linoleic |
| 13.72   | 296,264,222,180,97,83,69,55 | 9-Octadecenoic acid, methyl<br>ester,(E)-         | Methyl oleic       |
| 13.91   | 298,255,143,87,74           | Octadecanoic acid, methyl ester                   | Methyl stearic     |
| 14.12   | 280,109,95,81,67,55         | 9,12- Octadecadienoic acid,(E,E)-                 | Linoleic acid      |
| 14.17   | 282,264,222, 97,83,69,55    | 9-Octadecenoic acid,(E)-                          | Oleic acid         |
| 14.34   | 284,241,185,129,73,43       | Octadecanoic acid                                 | Stearic acid       |
